# Supplementary material
Source: PubMed Central journal article supplement (PMC3168618)
Supplement: supp_110218_varen-singh-2-at.pdf [file supp_110218_varen-singh-2-at.pdf]

**Appendix 2: Characteristics of varenicline randomized controlled trials included in the analysis of serious adverse cardiovascular events (part 1 of 2)**

| Source*                               | Phase | Location                      | Duration of treatment, wk | Duration of study, wk | Population              | Primary outcome | Cardiac exclusions at enrolment                       | Drug and dose            | No. of participants | Age, yr, mean (SD or range) | Males, % | White, % | No. of years of smoking, mean (SD or range) | Behavioural co-intervention                                           |
|---------------------------------------|-------|-------------------------------|---------------------------|-----------------------|-------------------------|-----------------|-------------------------------------------------------|--------------------------|---------------------|-----------------------------|----------|----------|---------------------------------------------|-----------------------------------------------------------------------|
| <b>Double-blind RCTs</b>              |       |                               |                           |                       |                         |                 |                                                       |                          |                     |                             |          |          |                                             |                                                                       |
| A3051080, 2010 <sup>16</sup>          | 4     | South Africa, SA, Middle East | 12                        | 26                    | Smokers                 | CAR             | Clinical significant CVD in last 6 mo, BP > 150 mm Hg | Varenicline 1 mg bid     | 394                 | 43.1 (18–69)                | 60.4     | 30.3     | NA                                          | NA                                                                    |
|                                       |       |                               |                           |                       |                         |                 |                                                       | Placebo                  | 199                 | 43.9 (20–71)                | 60.4†    | 7.6      | NA                                          |                                                                       |
| A3051095, 2010 <sup>17</sup>          | 4     | Multinational                 | 12                        | 24                    | Smokers                 | CQR, CAR        | No serious or unstable disease in last 6 mo           | Varenicline 1 mg bid     | 493                 | 43.9 (18–75)                | 60.3     | NA‡      | NA                                          | Smoking cessation counselling according to AHRQ guideline             |
|                                       |       |                               |                           |                       |                         |                 |                                                       | Placebo                  | 166                 | 43.2 (18–72)                | 60.0     | NA‡      | NA                                          |                                                                       |
| Fagerstrom et al, 2010d <sup>18</sup> | 4     | Sweden, Norway                | 12                        | 26                    | Smokeless tobacco users | CQR             | Any serious medical condition                         | Varenicline 1 mg bid     | 214                 | 43.9 (12.0)                 | 88.7     | 99.1     | 20.3 (11.0)                                 | Brief behavioural support                                             |
|                                       |       |                               |                           |                       |                         |                 |                                                       | Placebo                  | 218                 | 43.9 (12.0)                 | 89.9     | 99.5     | 21.7 (11.8)§                                |                                                                       |
| Gonzales et al, 2006 <sup>19</sup>    | 3     | US                            | 12                        | 52                    | Smokers                 | CQR             | CVD within last 6 mo                                  | Varenicline 1 mg bid     | 352                 | 42.5 (11.1)                 | 50.0     | 79.5     | 24.3 (11.5)                                 | Brief counselling                                                     |
|                                       |       |                               |                           |                       |                         |                 |                                                       | Bupropion 150 mg bid     | 329                 | 42.0 (11.7)                 | 58.4     | 80.2     | 24.1 (11.5)                                 |                                                                       |
|                                       |       |                               |                           |                       |                         |                 |                                                       | Placebo                  | 344                 | 42.6 (11.8)                 | 54.1     | 76.2     | 24.7 (12.1)                                 |                                                                       |
| Jorenby et al, 2006 <sup>20</sup>     | 3     | US                            | 12                        | 52                    | Smokers                 | CQR             | Clinically significant CVD in last 6 mo               | Varenicline 1 mg bid     | 344                 | 44.6 (11.4)                 | 55.2     | 85.5     | 27.1 (11.5)                                 | Smoking cessation counselling according to US Public Health guideline |
|                                       |       |                               |                           |                       |                         |                 |                                                       | Bupropion 150 mg bid     | 342                 | 42.9 (11.9)                 | 60.2     | 82.7     | 25.4 (12.0)                                 |                                                                       |
|                                       |       |                               |                           |                       |                         |                 |                                                       | Placebo                  | 341                 | 42.3 (11.6)                 | 58.1     | 85.0     | 24.4 (11.6)                                 |                                                                       |
| Nakamura et al, 2007 <sup>21</sup>    | 2     | Japan                         | 12                        | 52                    | Smokers                 | CAR             | Unstable CVD                                          | Varenicline 1 mg bid     | 156                 | 40.1 (11.6)                 | 79.2     | NA       | 21.5 (11.3)                                 | Smoking cessation counselling according to AHRQ guideline             |
|                                       |       |                               |                           |                       |                         |                 |                                                       | Varenicline 0.5 mg bid   | 156                 | 39.0 (12.0)                 | 71.1     | NA       | 20.1 (11.3)                                 |                                                                       |
|                                       |       |                               |                           |                       |                         |                 |                                                       | Varenicline 0.25 mg bid  | 153                 | 40.2 (12.3)                 | 72.7     | NA       | 20.9 (11.5)                                 |                                                                       |
|                                       |       |                               |                           |                       |                         |                 |                                                       | Placebo                  | 154                 | 39.9 (12.3)                 | 76       | NA       | 20.9 (11.4)                                 |                                                                       |
| Niaura et al, 2008 <sup>22</sup>      | 2     | US                            | 12                        | 52                    | Smokers                 | CAR             | History of CVD                                        | Varenicline              | 160                 | 41.5 (11.3)                 | 50.3     | 93.0     | 24.9 (4–50)                                 | Brief counselling                                                     |
|                                       |       |                               |                           |                       |                         |                 |                                                       | Placebo                  | 160                 | 42.1 (11.7)                 | 53.5     | 88.4     | 25.7 (2–46)                                 |                                                                       |
| Nides et al, 2006 <sup>23</sup>       | 2     | US                            | 7                         | 52                    | Smokers                 | CAR             | History of CVD                                        | Varenicline 0.3 mg daily | 128                 | 41.9 (10.6)                 | 50.0     | 88.1     | 24.6 (10.9)                                 | Standardized smoking cessation counselling                            |
|                                       |       |                               |                           |                       |                         |                 |                                                       | Varenicline 1 mg daily   | 128                 | 42.9 (10.5)                 | 43.7     | 88.1     | 25.4 (11.1)                                 |                                                                       |
|                                       |       |                               |                           |                       |                         |                 |                                                       | Varenicline 1 mg bid     | 127                 | 41.9 (9.8)                  | 50.4     | 85.6     | 23.4 (10.0)                                 |                                                                       |
|                                       |       |                               |                           |                       |                         |                 |                                                       | Bupropion 150 mg bid     | 128                 | 40.5 (10.8)                 | 45.2     | 88.3     | 23.4 (10.9)                                 |                                                                       |
|                                       |       |                               |                           |                       |                         |                 |                                                       | Placebo                  | 127                 | 41.6 (10.4)                 | 52.0     | 87.8     | 23.9 (10.6)                                 |                                                                       |

**Appendix 2: Characteristics of varenicline randomized controlled trials included in the analysis of serious adverse cardiovascular events (part 2 of 2)**

| Source                                                                                                                                                                                                                                                                                                                                                                                                                                                                                                                                                                                                                                                                                                                                                                                                                                                                                                                                | Phase | Location                    | Duration of treatment, wk | Duration of study, wk | Population        | Primary outcome     | Cardiac exclusions at enrolment                                   | Drug and dose                        | No. of participants | Age, yr, mean (SD or range) | Males, % | White, % | No. of years of smoking, mean (SD or range) | Behavioural co-intervention                                       |
|---------------------------------------------------------------------------------------------------------------------------------------------------------------------------------------------------------------------------------------------------------------------------------------------------------------------------------------------------------------------------------------------------------------------------------------------------------------------------------------------------------------------------------------------------------------------------------------------------------------------------------------------------------------------------------------------------------------------------------------------------------------------------------------------------------------------------------------------------------------------------------------------------------------------------------------|-------|-----------------------------|---------------------------|-----------------------|-------------------|---------------------|-------------------------------------------------------------------|--------------------------------------|---------------------|-----------------------------|----------|----------|---------------------------------------------|-------------------------------------------------------------------|
| Oncken et al, 2006 <sup>24</sup>                                                                                                                                                                                                                                                                                                                                                                                                                                                                                                                                                                                                                                                                                                                                                                                                                                                                                                      | 2     | US                          | 12                        | 52                    | Smokers           | CAR                 | History of CVD                                                    | Varenicline 1 mg bid, titrated       | 130                 | 42.2 (10.7)                 | 48.5     | 80.8     | 24.0 (11.1)                                 | Brief counselling                                                 |
|                                                                                                                                                                                                                                                                                                                                                                                                                                                                                                                                                                                                                                                                                                                                                                                                                                                                                                                                       |       |                             |                           |                       |                   |                     |                                                                   | Varenicline 1 mg bid, nontitrated    | 129                 | 43.7 (10.0)                 | 48.8     | 83.7     | 25.7 (10.6)                                 |                                                                   |
|                                                                                                                                                                                                                                                                                                                                                                                                                                                                                                                                                                                                                                                                                                                                                                                                                                                                                                                                       |       |                             |                           |                       |                   |                     |                                                                   | Varenicline 0.5 mg bid, titrated     | 130                 | 43.5 (10.5)                 | 53.1     | 80.8     | 25.0 (10.8)                                 |                                                                   |
|                                                                                                                                                                                                                                                                                                                                                                                                                                                                                                                                                                                                                                                                                                                                                                                                                                                                                                                                       |       |                             |                           |                       |                   |                     |                                                                   | Varenicline 0.5 mg bid, not titrated | 129                 | 42.9 (10.1)                 | 45.0     | 85.3     | 26.0 (10.8)                                 |                                                                   |
|                                                                                                                                                                                                                                                                                                                                                                                                                                                                                                                                                                                                                                                                                                                                                                                                                                                                                                                                       |       |                             |                           |                       |                   |                     |                                                                   | Placebo                              | 129                 | 43.0 (9.4)                  | 51.9     | 72.1     | 25.3 (9.5)                                  |                                                                   |
| Rigotti et al, 2010 <sup>6</sup>                                                                                                                                                                                                                                                                                                                                                                                                                                                                                                                                                                                                                                                                                                                                                                                                                                                                                                      | 3b    | North America, Europe, Asia | 12                        | 52                    | Smokers           | CAR                 | Excluded if unstable CVD in last 2 mo; included with stable CVD** | Varenicline 1 mg bid                 | 355                 | 57.0 (8.6)                  | 75.2     | 80.3     | 40 (5–63)                                   | Brief counselling                                                 |
|                                                                                                                                                                                                                                                                                                                                                                                                                                                                                                                                                                                                                                                                                                                                                                                                                                                                                                                                       |       |                             |                           |                       |                   |                     |                                                                   | Placebo                              | 359                 | 55.9 (8.3)                  | 82.2     | 80.8     | 39 (12–60)                                  |                                                                   |
| Tashkin et al, 2010 <sup>25</sup>                                                                                                                                                                                                                                                                                                                                                                                                                                                                                                                                                                                                                                                                                                                                                                                                                                                                                                     | 3b    | US, Europe                  | 12                        | 52                    | Smokers with COPD | CAR                 | Unstable CVD or history of CVD in last 6 mo                       | Varenicline 1 mg bid                 | 250                 | 57.2 (35–83)                | 62.5     | 81.9     | 40.4 (11–67)                                | Brief counselling according to US Public Health Service guideline |
|                                                                                                                                                                                                                                                                                                                                                                                                                                                                                                                                                                                                                                                                                                                                                                                                                                                                                                                                       |       |                             |                           |                       |                   |                     |                                                                   | Placebo                              | 254                 | 57.1 (34–77)                | 62.2     | 84.1     | 40.6 (18–64)                                |                                                                   |
| Tonstad et al, 2006 <sup>26</sup>                                                                                                                                                                                                                                                                                                                                                                                                                                                                                                                                                                                                                                                                                                                                                                                                                                                                                                     | 3     | Multinational               | 12                        | 52                    | Smokers           | Long-term quit rate | CVD within last 6 mo                                              | Varenicline 1 mg bid                 | 603                 | 45.4 (10.4)                 | 50.2     | 96.7     | 28.2 (10.4)                                 | 10 min of smoking cessation counselling                           |
|                                                                                                                                                                                                                                                                                                                                                                                                                                                                                                                                                                                                                                                                                                                                                                                                                                                                                                                                       |       |                             |                           |                       |                   |                     |                                                                   | Placebo                              | 607                 | 45.3 (10.4)                 | 48.3     | 97       | 28.1 (10.5)                                 |                                                                   |
| Tsai et al, 2007 <sup>27</sup>                                                                                                                                                                                                                                                                                                                                                                                                                                                                                                                                                                                                                                                                                                                                                                                                                                                                                                        | 3b    | Taiwan, Korea               | 12                        | 24                    | Smokers           | CAR                 | Unstable CVD                                                      | Varenicline 1 mg bid                 | 126                 | 39.7 (9.3)                  | 84.9     | NA       | 20.2 (3–45)                                 | 10 min of counselling according to AHRQ guideline                 |
|                                                                                                                                                                                                                                                                                                                                                                                                                                                                                                                                                                                                                                                                                                                                                                                                                                                                                                                                       |       |                             |                           |                       |                   |                     |                                                                   | Placebo                              | 124                 | 40.9 (11.1)                 | 92.7     | NA       | 22.1 (3–52)                                 |                                                                   |
| Williams et al, 2007 <sup>28</sup>                                                                                                                                                                                                                                                                                                                                                                                                                                                                                                                                                                                                                                                                                                                                                                                                                                                                                                    | 3     | US, Australia               | 52                        | 52                    | Smokers           | Long-term safety    | Clinically significant CVD in last 6 mo                           | Varenicline 1 mg bid                 | 251                 | 48.2 (12.3)                 | 50.6     | 86.9     | 30.7 (4–57)                                 | Brief counselling according to AHRQ guideline                     |
|                                                                                                                                                                                                                                                                                                                                                                                                                                                                                                                                                                                                                                                                                                                                                                                                                                                                                                                                       |       |                             |                           |                       |                   |                     |                                                                   | Placebo                              | 126                 | 46.6 (12.1)                 | 48.4     | 92.1     | 29.9(6–57)                                  |                                                                   |
| <b>Open-label RCT</b>                                                                                                                                                                                                                                                                                                                                                                                                                                                                                                                                                                                                                                                                                                                                                                                                                                                                                                                 |       |                             |                           |                       |                   |                     |                                                                   |                                      |                     |                             |          |          |                                             |                                                                   |
| Aubin et al, 2008 <sup>29</sup>                                                                                                                                                                                                                                                                                                                                                                                                                                                                                                                                                                                                                                                                                                                                                                                                                                                                                                       | 3     | US, Europe                  | 12                        | 52                    | Smokers           | CAR                 | Serious or unstable disease in last 6 mo                          | Varenicline 1 mg bid                 | 378                 | 42.9 (10.5)                 | 48.4     | 92.6     | 25.9(2–58)                                  | Counselling according to US Public Health Service guideline       |
|                                                                                                                                                                                                                                                                                                                                                                                                                                                                                                                                                                                                                                                                                                                                                                                                                                                                                                                                       |       |                             |                           |                       |                   |                     |                                                                   | Nicotine transdermal patch           | 379                 | 42.9 (12.0)                 | 50.0     | 93.5     | 25.2(1–62)                                  |                                                                   |
| <p>Note: CAR = continuous abstinence rates, COPD = chronic obstructive pulmonary disease, CQR = continuous quit rate, CVD = cardiovascular disease, SBP= systolic blood pressure, SD = standard deviation.<br/>                     *Citations of the studies are available in the reference list of the main article (<a href="http://www.cmaj.ca/lookup/doi/10.1503/cmaj.110218">www.cmaj.ca/lookup/doi/10.1503/cmaj.110218</a>).<br/>                     †Males in this study were reported for overall study population, not by treatment assignment.<br/>                     ‡Majority were white.<br/>                     §No of years of smokeless tobacco use.<br/>                     **The proportion of participants with cardiac disease in varenicline v. placebo was angina (53.2% v. 47.9%), myocardial infarction (45.9% v. 52.4%), prior coronary revascularization (46.2% v. 51.5%), stroke (4.5% v. 6.7%).</p> |       |                             |                           |                       |                   |                     |                                                                   |                                      |                     |                             |          |          |                                             |                                                                   |
