# Supplementary material
Source: PubMed Central journal article supplement (PMC3168618)
Supplement: supp_110218_varen-singh-3-at.pdf [file supp_110218_varen-singh-3-at.pdf]

**Appendix 3: Risk-of-bias assessment and methodologic details of randomized controlled trials of varenicline included in the analysis of serious adverse cardiovascular events**

| Study*                                | Sequence generation                                   | Allocation concealment | Adequate monitoring of adverse events                                                                                                                                                                                                                                                                                   | Drug and dose                      | Withdrawal rate, % | Loss to follow-up, % |
|---------------------------------------|-------------------------------------------------------|------------------------|-------------------------------------------------------------------------------------------------------------------------------------------------------------------------------------------------------------------------------------------------------------------------------------------------------------------------|------------------------------------|--------------------|----------------------|
| Protocol A3051080, 2010 <sup>16</sup> | Unclear                                               | Unclear                | Adequate; adverse events, vital signs, electrocardiogram (screening and end of treatment), physical examination and laboratory tests at wk 1, 2, 3, 4, 6, 8, 10, 12, 13, 16, 20, 24                                                                                                                                     | Varenicline 1 mg bid               | 13.8               | 2.3                  |
|                                       |                                                       |                        |                                                                                                                                                                                                                                                                                                                         | Placebo                            | 22.2               | 2.5                  |
| Protocol A3051095, 2010 <sup>17</sup> | Unclear                                               | Unclear                | Adverse events, vital signs, electrocardiogram, physical examination, laboratory tests                                                                                                                                                                                                                                  | Varenicline 1 mg bid               | 12.6               | 1.9                  |
|                                       |                                                       |                        |                                                                                                                                                                                                                                                                                                                         | Placebo                            | 14.5               | 6.1                  |
| Fagerstrom et al., 2010 <sup>18</sup> | Adequate; telephone interactive voice response system | Adequate               | Adverse event monitoring and baseline laboratory tests, physical examination and vital signs                                                                                                                                                                                                                            | Varenicline 1 mg bid               | 20.2               | 4.2                  |
|                                       |                                                       |                        |                                                                                                                                                                                                                                                                                                                         | Placebo                            | 22.0               | 2.8                  |
| Gonzales et al., 2006 <sup>19</sup>   | Centralized; computer-generated randomization         | Adequate               | All observed or self-reported adverse events were documented; those resulting in hospital admission, disability or death within 7 d of last drug dose were classified as serious                                                                                                                                        | Varenicline 1 mg bid               | 25.5               | 12.2                 |
|                                       |                                                       |                        |                                                                                                                                                                                                                                                                                                                         | Bupropion 150 mg bid               | 31.6               | 10.9                 |
|                                       |                                                       |                        |                                                                                                                                                                                                                                                                                                                         | Placebo                            | 37.5               | 14.2                 |
| Jorenby et al., 2006 <sup>20</sup>    | Centralized; computer-generated list                  | Adequate               | All observed or self-reported adverse events were documented; electrocardiogram and urinalysis repeated at 2 and 12 wk                                                                                                                                                                                                  | Varenicline 1 mg bid               | 24.1               | 9.5                  |
|                                       |                                                       |                        |                                                                                                                                                                                                                                                                                                                         | Bupropion 150 mg bid               | 29.2               | 11.4                 |
|                                       |                                                       |                        |                                                                                                                                                                                                                                                                                                                         | Placebo                            | 34.6               | 12.6                 |
| Nakamura et al., 2007 <sup>21</sup>   | Computer-generated list of random numbers             | Adequate               | Physical examination, blood pressure, body weight, adverse and serious adverse events, and AEs and SAEs and electrocardiogram at each clinic visit from baseline to 52 wk                                                                                                                                               | Varenicline 1 mg bid               | 20.5               | NA                   |
|                                       |                                                       |                        |                                                                                                                                                                                                                                                                                                                         | Varenicline 0.5 mg bid             | 17.4               | NA                   |
|                                       |                                                       |                        |                                                                                                                                                                                                                                                                                                                         | Varenicline 0.25 mg bid            | 17.6               | NA                   |
|                                       |                                                       |                        |                                                                                                                                                                                                                                                                                                                         | Placebo                            | 14.3               | NA                   |
| Niaura et al., 2008 <sup>22</sup>     | Centralized                                           | Adequate               | No safety assessments in follow-up period; adverse events resulting in hospital admission, disability or death within 7 d of last drug dose were classified as serious                                                                                                                                                  | Varenicline 1 mg/d                 | 22                 | NA                   |
|                                       |                                                       |                        |                                                                                                                                                                                                                                                                                                                         | Placebo                            | 29                 | NA                   |
| Nides et al., 2006 <sup>23</sup>      | Computer-generated randomization                      | Adequate               | Adverse events, laboratory tests, vital signs, 12-lead electrocardiogram and physical examination. Serious adverse events recorded through 30 d after last study dose; adverse events after 30 d were reported if investigator considered them related to study medication                                              | Varenicline 0.3 mg/d               | 31.7               | 9.5                  |
|                                       |                                                       |                        |                                                                                                                                                                                                                                                                                                                         | Varenicline 1 mg/d                 | 29.4               | 7.1                  |
|                                       |                                                       |                        |                                                                                                                                                                                                                                                                                                                         | Varenicline 1 mg bid               | 31.2               | 11.0                 |
|                                       |                                                       |                        |                                                                                                                                                                                                                                                                                                                         | Bupropion 150 mg bid               | 28.6               | 3.9                  |
|                                       |                                                       |                        |                                                                                                                                                                                                                                                                                                                         | Placebo                            | 33.3               | 12.6                 |
| Oncken et al., 2006 <sup>24</sup>     | Unclear                                               | Unclear                | Vital signs, weight and adverse events collected at each visit; electrocardiogram at screening baseline and at 1, 4, 7 and 12 wk                                                                                                                                                                                        | Varenicline 1 mg bid titrated      | 23.1               | 0                    |
|                                       |                                                       |                        |                                                                                                                                                                                                                                                                                                                         | Varenicline 1 mg bid nontitrated   | 26.4               | 16.2                 |
|                                       |                                                       |                        |                                                                                                                                                                                                                                                                                                                         | Varenicline 0.5 mg bid titrated    | 29.2               | 21.5                 |
|                                       |                                                       |                        |                                                                                                                                                                                                                                                                                                                         | Varenicline 0.5 mg bid nontitrated | 25.6               | 20.9                 |
|                                       |                                                       |                        |                                                                                                                                                                                                                                                                                                                         | Placebo                            | 44.2               | 28.6                 |
| Rigotti et al., 2010 <sup>9</sup>     | Computer-generated list                               | Adequate               | Adverse events resulting in hospital admission, disability or death, or congenital anomaly or birth defect were classified as serious. Reported or observed cardiovascular events or deaths were reviewed and adjudicated under blinded conditions by an independent event committee that used a standard events manual | Varenicline 1 mg bid               | 16.9               | 1.7                  |
|                                       |                                                       |                        |                                                                                                                                                                                                                                                                                                                         | Placebo                            | 17.8               | 0.8                  |
| Tashkin et al., 2010 <sup>25</sup>    | Unclear                                               | Unclear                | Adverse events, vital signs, physical examination, body weight and height, electrocardiograms and laboratory tests. Serious adverse events collected 28 d after last dose of study drug                                                                                                                                 | Varenicline 1 mg bid               | 16.5               | 11.7                 |
|                                       |                                                       |                        |                                                                                                                                                                                                                                                                                                                         | Placebo                            | 23.1               | 12.4                 |
| Tonstad et al., 2006 <sup>26</sup>    | Centralized; computer-generated randomization         | Adequate               | Physical examination at screening and at 12 and 24 wk; electrocardiogram at 2, 12 and 24 wk                                                                                                                                                                                                                             | Varenicline 1 mg bid               | 7.7                | 1.9                  |
|                                       |                                                       |                        |                                                                                                                                                                                                                                                                                                                         | Placebo                            | 15.5               | 5.1                  |
| Tsai et al., 2007 <sup>27</sup>       | Randomized; permuted block via Web and telephone      | Adequate               | Adverse events, vital signs, physical examination, body weight and height, electrocardiograms and laboratory tests at study visits                                                                                                                                                                                      | Varenicline 1 mg bid               | 3.2                | 1.5                  |
|                                       |                                                       |                        |                                                                                                                                                                                                                                                                                                                         | Placebo                            | 3.2                | 0                    |
| Williams et al., 2007 <sup>28</sup>   | Unclear                                               | Unclear                | Adverse events and vital signs at each visit; urine and blood tests at 2, 12, 24, 36 and 52 wk; physical examination and electrocardiogram at screening and at 24 and 52 wk                                                                                                                                             | Varenicline 1 mg bid               | 46.2               | 10.0                 |
|                                       |                                                       |                        |                                                                                                                                                                                                                                                                                                                         | Placebo                            | 53.2               | 15.1                 |
| Aubin et al.,† 2008 <sup>29</sup>     | Centralized; computer-generated randomization         | Unclear                | Laboratory tests, vital signs, physical examination and electrocardiogram during treatment period. Adverse events resulting in hospital admission, disability or death were classified as serious                                                                                                                       | Varenicline 1 mg bid               | 17.3               | 5.9                  |
|                                       |                                                       |                        |                                                                                                                                                                                                                                                                                                                         | Nicotine transdermal patch         | 20.3               | 4.9                  |

Note: NA = not available.

\*All trials except Aubin et al.<sup>29</sup> were double blind. Citations of the studies are available in the reference list of the main article ([www.cmaj.ca/lookup/doi/10.1503/cmaj.110218](http://www.cmaj.ca/lookup/doi/10.1503/cmaj.110218)).

†Open-label trial.
