# Supplementary material
Source: PubMed Central journal article supplement (PMC3168618)
Supplement: supp_110218_varen-singh-4-at.pdf [file supp_110218_varen-singh-4-at.pdf]

| <b>Appendix 4: Data on serious adverse cardiovascular events and mortality reported in RCTs of varenicline</b> |                |                     |                                               |                                                                                                                                             |                              |
|----------------------------------------------------------------------------------------------------------------|----------------|---------------------|-----------------------------------------------|---------------------------------------------------------------------------------------------------------------------------------------------|------------------------------|
| Study*                                                                                                         | Treatment arms | No. of participants | No. of serious adverse cardiovascular events† | Nature of cardiovascular adverse events                                                                                                     | No. of deaths from any cause |
| <b>Double-blind RCTs</b>                                                                                       |                |                     |                                               |                                                                                                                                             |                              |
| A3051080, 2010 <sup>16</sup>                                                                                   | Varenicline    | 394                 | 1                                             | Tachycardia/bradycardia                                                                                                                     | 0                            |
|                                                                                                                | Placebo        | 199                 | 0                                             | NA                                                                                                                                          | 0                            |
| A3051095, 2010 <sup>17</sup>                                                                                   | Varenicline    | 493                 | 1                                             | Atrial flutter                                                                                                                              | 0                            |
|                                                                                                                | Placebo        | 166                 | 0                                             | NA                                                                                                                                          | 0                            |
| Fagerstrom et al, 2010 <sup>18</sup>                                                                           | Varenicline    | 214                 | 0                                             | NA                                                                                                                                          | 0                            |
|                                                                                                                | Placebo        | 218                 | 1                                             | Cardiac failure                                                                                                                             | 0                            |
| Gonzales et al, 2006 <sup>19</sup>                                                                             | Varenicline    | 352                 | 2                                             | Atrial fibrillation; stroke                                                                                                                 | 0                            |
|                                                                                                                | Bupropion      | 329                 | 0                                             | NA                                                                                                                                          | 0                            |
|                                                                                                                | Placebo        | 344                 | 2                                             | Atrial fibrillation, acute myocardial infarction                                                                                            | 1                            |
| Jorenby et al, 2006 <sup>20</sup>                                                                              | Varenicline    | 344                 | 1                                             | Acute coronary syndrome                                                                                                                     | 0                            |
|                                                                                                                | Bupropion      | 342                 | 1                                             | Coronary artery occlusion                                                                                                                   | 1                            |
|                                                                                                                | Placebo        | 341                 | 1                                             | Ischemic heart disease                                                                                                                      | 0                            |
| Nakamura et al, 2007 <sup>21</sup>                                                                             | Varenicline    | 465                 | 1                                             | Angina pectoris                                                                                                                             | 1                            |
|                                                                                                                | Placebo        | 154                 | 0                                             | NA                                                                                                                                          | 0                            |
| Niaura et al, 2008 <sup>22</sup>                                                                               | Varenicline    | 160                 | 2                                             | Myocardial infarction; ventricular fibrillation                                                                                             | 0                            |
|                                                                                                                | Placebo        | 160                 | 0                                             | NA                                                                                                                                          | 0                            |
| Nides et al, 2006 <sup>23</sup>                                                                                | Varenicline    | 383                 | 1                                             | Transient ischemic attack                                                                                                                   | 0                            |
|                                                                                                                | Bupropion      | 128                 | 0                                             | NA                                                                                                                                          | 0                            |
|                                                                                                                | Placebo        | 127                 | 0                                             | NA                                                                                                                                          | 0                            |
| Oncken et al, 2006 <sup>24</sup>                                                                               | Varenicline    | 518                 | 2                                             | Unstable angina; paroxysmal supraventricular tachycardia                                                                                    | 0                            |
|                                                                                                                | Placebo        | 129                 | 0                                             | NA                                                                                                                                          | 0                            |
| Rigotti et al, 2010 <sup>9‡</sup>                                                                              | Varenicline    | 355                 | 25                                            | Prespecified adjudicated events                                                                                                             | 2                            |
|                                                                                                                | Placebo        | 359                 | 20                                            | Prespecified adjudicated events                                                                                                             | 5                            |
| Tashkin et al, 2010 <sup>25</sup>                                                                              | Varenicline    | 250                 | 5                                             | Nonfatal acute myocardial infarction; nonfatal angina pectoris; cerebrovascular accident; left ventricular dysfunction; sudden death        | 2                            |
|                                                                                                                | Placebo        | 254                 | 2                                             | Ischemic stroke; Acute myocardial infarction                                                                                                | 1                            |
| Tonstad et al, 2006 <sup>26</sup>                                                                              | Varenicline    | 603                 | 4                                             | Suspected myocardial infarction; myocardial infarction; cerebral infarct and cerebral vein thrombosis; supraventricular tachycardia         | 2                            |
|                                                                                                                | Placebo        | 607                 | 0                                             | NA                                                                                                                                          | 0                            |
| Tsai et al, 2007 <sup>27</sup>                                                                                 | Varenicline    | 126                 | 1                                             | Unstable angina and coronary occlusion                                                                                                      | 0                            |
|                                                                                                                | Placebo        | 124                 | 0                                             | NA                                                                                                                                          | 0                            |
| Williams et al, 2007 <sup>28</sup>                                                                             | Varenicline    | 251                 | 6                                             | Coronary artery disease; ventricular bigeminy and coronary angioplasty; stroke; cardiac catheterization; tachycardia, myocardial infarction | 0                            |
|                                                                                                                | Placebo        | 126                 | 1                                             | Worsening coronary artery disease                                                                                                           | 0                            |
| <b>Open-label RCT</b>                                                                                          |                |                     |                                               |                                                                                                                                             |                              |
| Aubin et al, 2008 <sup>29</sup>                                                                                | Varenicline    | 378                 | 0                                             | NA                                                                                                                                          | 0                            |
|                                                                                                                | NRT            | 379                 | 2                                             | Myocardial infarction                                                                                                                       | 0                            |

Note: NA = not applicable, NRT = nicotine-replacement therapy.

\*Citations of the studies are available in the reference list of the main article ([www.cmaj.ca/lookup/doi/10.1503/cmaj.110218](http://www.cmaj.ca/lookup/doi/10.1503/cmaj.110218)).

†Ischemic, arrhythmic, and congestive heart failure and cardiovascular death.

‡An additional 11 investigator-reported cardiovascular events (9 for varenicline v. 2 for placebo) were deemed to not meet criteria for adjudication.
